# Supplementary material for: Predicting rapid progression in knee osteoarthritis: a novel and interpretable automated machine learning approach, with specific focus on young patients and early disease
Source: HighWire-hosted journal article supplement (doi:10.1136/ard-2024-225872), 2024-09-05
Supplement: ard-2024-225872supp007_data_supplement.pdf [file ard-2024-225872supp007_data_supplement.pdf]

**Supplemental Table 7: Demographic characteristics of the subpopulations in the hold-out set**

This table provides a breakdown of the demographic characteristics among the subpopulations in the hold-out validation set used in our subgroup analysis.

| Characteristics           | Age <60    | Age >60     | Male         | Female       | White ethnicity | Black ethnicity |
|---------------------------|------------|-------------|--------------|--------------|-----------------|-----------------|
| Number of instances       | 135        | 203         | 154          | 184          | 247             | 75              |
| Sex:                      |            |             |              |              |                 |                 |
| Male                      | 66 (48.9%) | 88 (43.3%)  | 154 (100.0%) | 0 (0.0%)     | 126 (51.0%)     | 20 (26.7%)      |
| Female                    | 69 (51.1%) | 115 (56.7%) | 0 (0.0%)     | 184 (100.0%) | 121 (49.0%)     | 55 (73.3%)      |
| Age (years):              |            |             |              |              |                 |                 |
| Range                     | 45 – 59    | 60 – 81     | 45 – 80      | 46 – 81      | 45 – 81         | 48 – 80         |
| Median                    | 53.0       | 69.0        | 63.0         | 64.0         | 64.0            | 59.0            |
| Ethnicity:                |            |             |              |              |                 |                 |
| Asian                     | 2 (1.5%)   | 0 (0.0%)    | 0 (0.0%)     | 2 (1.1%)     | 0 (0.0%)        | 0 (0.0%)        |
| Black or African American | 40 (29.6%) | 35 (17.2%)  | 20 (13.0%)   | 55 (29.9%)   | 0 (0.0%)        | 75 (100.0%)     |
| White or Caucasian        | 88 (65.2%) | 159 (78.3%) | 126 (81.8%)  | 121 (65.8%)  | 247 (100.0%)    | 0 (0.0%)        |
| Other Non-White           | 5 (3.7%)   | 9 (4.4%)    | 8 (5.2%)     | 6 (3.3%)     | 0 (0.0%)        | 0 (0.0%)        |
| Baseline KLG:             |            |             |              |              |                 |                 |
| KLG 0                     | 0 (0.0%)   | 0 (0.0%)    | 0 (0.0%)     | 0 (0.0%)     | 0 (0.0%)        | 0 (0.0%)        |
| KLG 1                     | 12 (8.9%)  | 21 (10.3%)  | 22 (14.3%)   | 11 (6.0%)    | 30 (12.1%)      | 3 (4.0%)        |
| KLG 2                     | 89 (65.9%) | 77 (37.9%)  | 55 (35.7%)   | 111 (60.3%)  | 107 (43.3%)     | 56 (74.7%)      |
| KLG 3                     | 34 (25.2%) | 105 (51.7%) | 77 (50.0%)   | 62 (33.7%)   | 110 (44.5%)     | 16 (21.3%)      |
| KLG 4                     | 0 (0.0%)   | 0 (0.0%)    | 0 (0.0%)     | 0 (0.0%)     | 0 (0.0%)        | 0 (0.0%)        |
| Clinical Outcomes:        |            |             |              |              |                 |                 |
| Class 0                   | 79 (58.5%) | 126 (62.1%) | 90 (58.4%)   | 115 (62.5%)  | 157 (63.6%)     | 41 (54.7%)      |
| Class 1                   | 18 (13.3%) | 16 (7.9%)   | 8 (5.2%)     | 26 (14.1%)   | 15 (6.1%)       | 19 (25.3%)      |
| Class 2                   | 28 (20.7%) | 49 (24.1%)  | 49 (31.8%)   | 28 (15.2%)   | 65 (26.3%)      | 4 (5.3%)        |
| Class 3                   | 10 (7.4%)  | 12 (5.9%)   | 7 (4.5%)     | 15 (8.2%)    | 10 (4.0%)       | 11 (14.7%)      |
