# Supplementary material for: Predicting rapid progression in knee osteoarthritis: a novel and interpretable automated machine learning approach, with specific focus on young patients and early disease
Source: HighWire-hosted journal article supplement (doi:10.1136/ard-2024-225872), 2024-09-05

**Supplemental Figure 1: Overview of subgroup analysis.** This figure schematically presents our approach to subgroup analysis. **A)** Initially, model AP5\_mu and AP5\_bi (including all 304 variables), were assessed on various subgroups from the hold-out validation set. A *post-hoc* interpretability analysis was performed for these subgroups using the comprehensive AP5\_mu and AP5\_bi models. **B)** This was followed by the evaluation of models AP1\_mu and AP1\_bi (including clinical data) and our streamlined models AP5\_top5\_mu and AP5\_top5\_bi, on three distinct subgroups within the external validation set: 1) under-60 participants from the POMA study; 2) patients with early-stage OA (KLG 0-1); 3) patients without initial radiographic OA signs (KLG 0). (Created with BioRender.com).

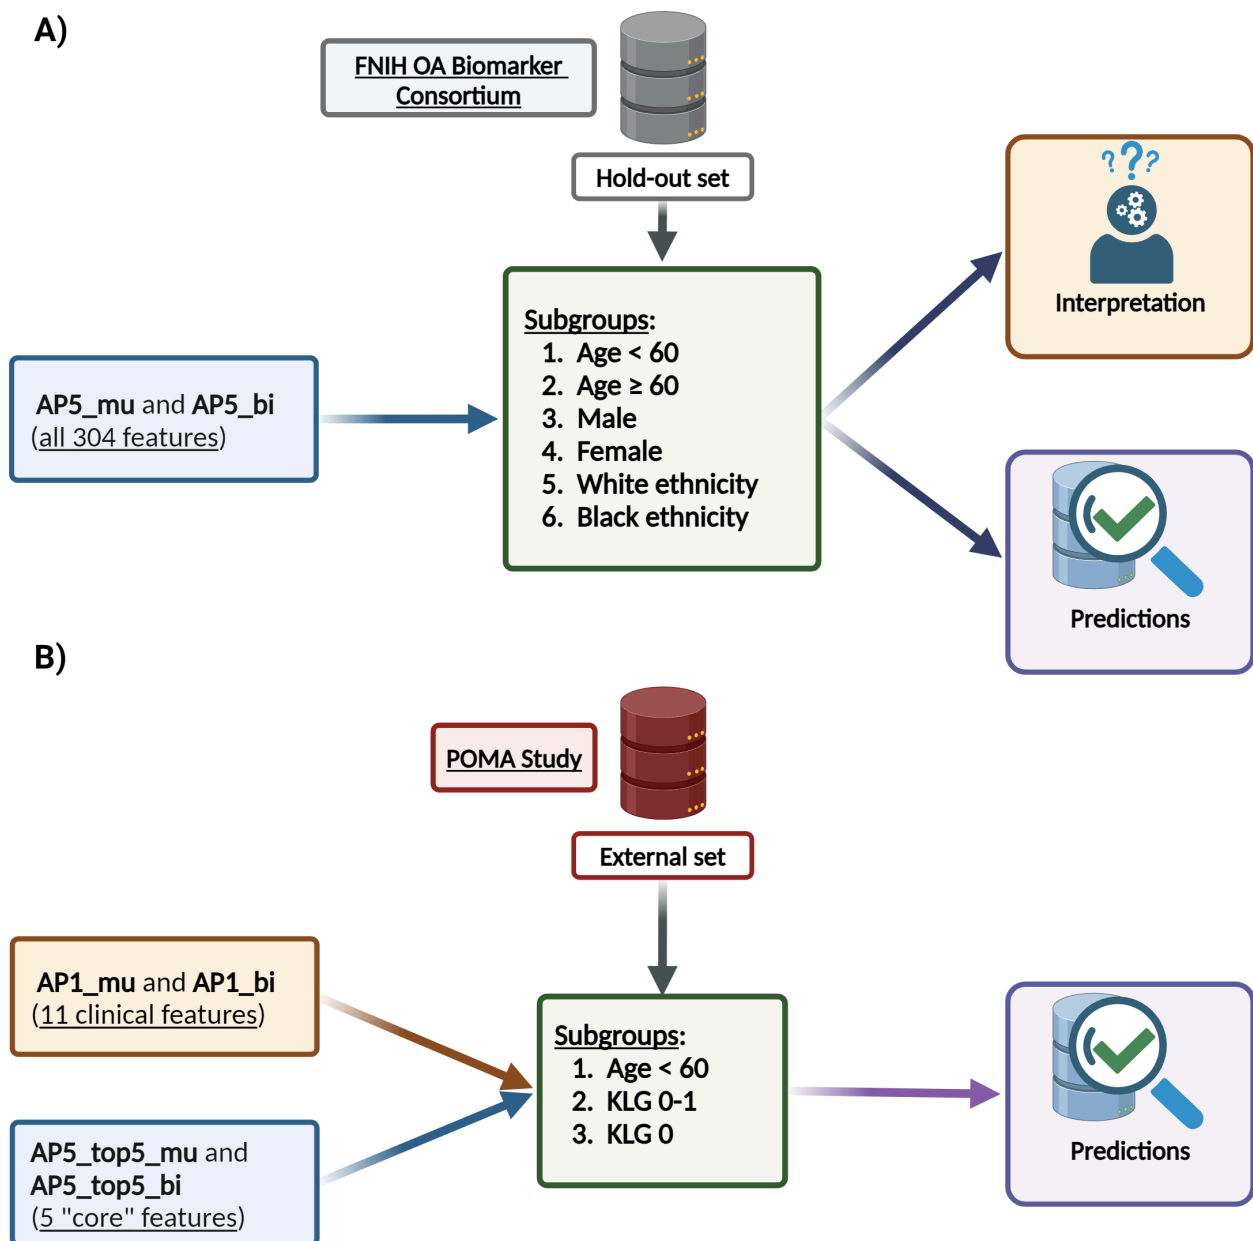

Supplement: ard-2024-225872supp009_data_supplement.pdf [file ard-2024-225872supp009_data_supplement.pdf]
