# Supplementary material for: Predicting rapid progression in knee osteoarthritis: a novel and interpretable automated machine learning approach, with specific focus on young patients and early disease
Source: HighWire-hosted journal article supplement (doi:10.1136/ard-2024-225872), 2024-09-05

**Supplemental Figure 5: Confusion matrices for external validation.** Confusion matrices for models AP1\_mu, AP1\_bi, AP5\_top5\_mu and AP5\_top5\_bi, validated using patients from the POMA study. The predicted classes were determined by assigning the class with the highest predicted probability as the outcome, rather than applying a specific probability threshold.

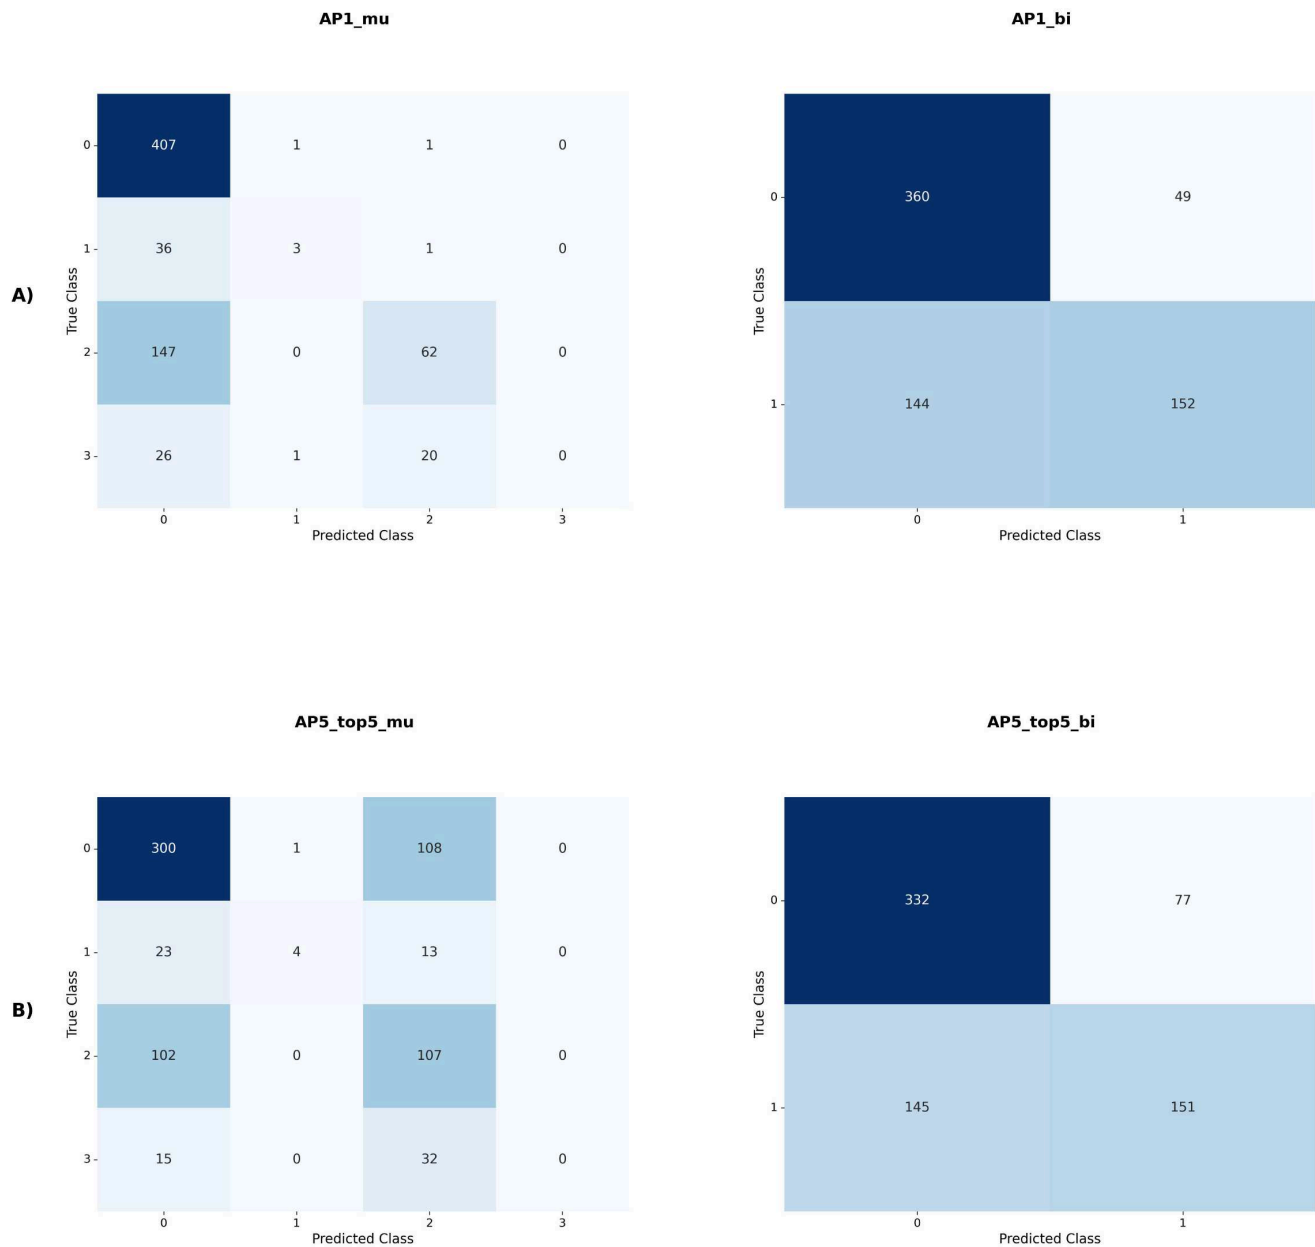

Supplement: ard-2024-225872supp013_data_supplement.pdf [file ard-2024-225872supp013_data_supplement.pdf]
