# Supplementary material for: Predicting rapid progression in knee osteoarthritis: a novel and interpretable automated machine learning approach, with specific focus on young patients and early disease
Source: HighWire-hosted journal article supplement (doi:10.1136/ard-2024-225872), 2024-09-05

**Supplemental Figure 12: Assessment of feature impact on BINARY predictions for patients with AGE < 60 in the hold-out set.** Assessment of feature impact on non-progression (Class 0) and progression (Class 1), using “Kernel-SHAP” for binary predictions with model AP5\_bi. **Left and Middle** – impact distribution of the most important features for Class 0 (Left) and Class 1 (Middle). The colour represents the feature value (red = high, blue = low). A positive SHAP value represents a positive impact on class prediction. **Right** – average impact magnitude of the most important features on class prediction.

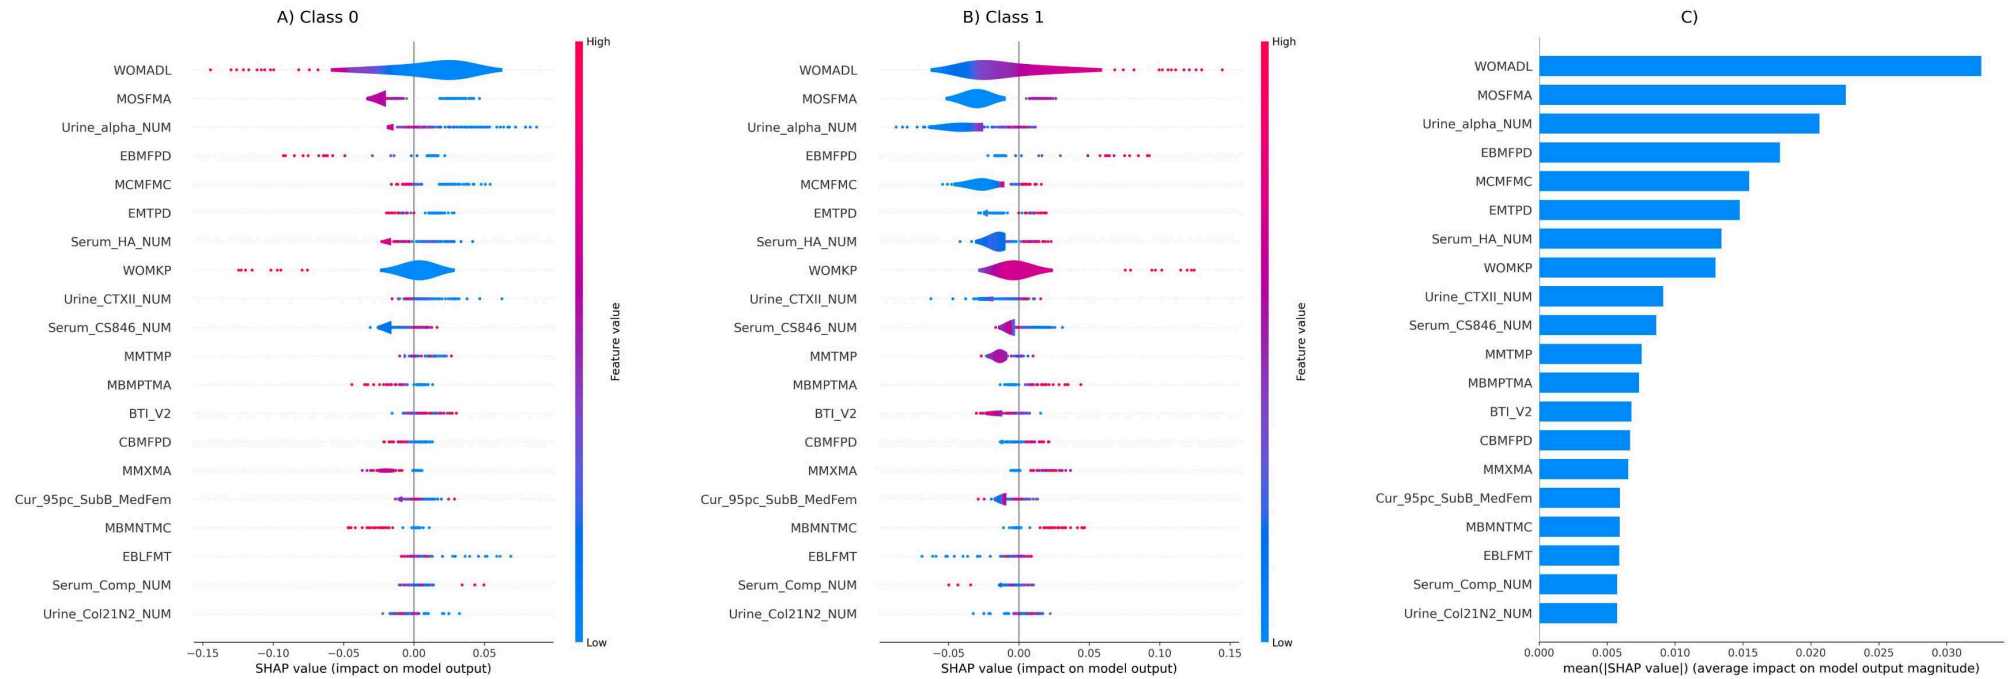

Supplement: ard-2024-225872supp020_data_supplement.pdf [file ard-2024-225872supp020_data_supplement.pdf]
